# Supplementary material for: Synthesis, Crystallographic Structure, Theoretical Analysis, Molecular Docking Studies, and Biological Activity Evaluation of Binuclear Ru(II)-1-Naphthylhydrazine Complex
Source: MDPI journal article supplement (doi:10.3390/ijms24010689), 2022-12-30
Supplement: s1 [file s1]

Supplementary Information for:

# Synthesis, Crystallographic Structure, Theoretical Analysis, Molecular Docking Studies, and Biological Activity Evaluation of Binuclear Ru(II)-1-Naphthylhydrazine Complex

Thomas Eichhorn <sup>1</sup>, Franz Kolbe <sup>1</sup>, Stefan Mišić <sup>1,2</sup>, Dušan Dimić <sup>2</sup>, Ibrahim Morgan <sup>3</sup>,  
Mohamad Saoud <sup>3</sup>, Dejan Milenković <sup>4</sup>, Zoran Marković <sup>4</sup>, Tobias Rüffer <sup>5</sup>,  
Jasmina Dimitrić Marković <sup>2,\*</sup> and Goran N. Kaluđerović <sup>1,\*</sup>

<sup>1</sup> Department of Engineering and Natural Sciences, University of Applied Sciences  
Merseburg, Eberhard-Leibnitz-Straße 2, 06217 Merseburg, Germany

<sup>2</sup> Faculty of Physical Chemistry, University of Belgrade, Studentski trg 12-16,  
11000 Belgrade, Serbia

<sup>3</sup> Department of Bioorganic Chemistry, Leibniz Institute of Plant Biochemistry, Weinberg 3,  
06120 Halle (Saale), Germany

<sup>4</sup> Department of Science, Institute for Information Technologies, University of Kragujevac,  
Jovana Cvijića bb, 34000 Kragujevac, Serbia

<sup>5</sup> Institute of Chemistry, Chemnitz University of Technology, Straße der Nationen 62,  
D-09111 Chemnitz, Germany

\* Correspondence: markovich@ffh.bg.ac.rs (J.D.M.); goran.kaluderovic@hs-merseburg.de (G.N.K.)

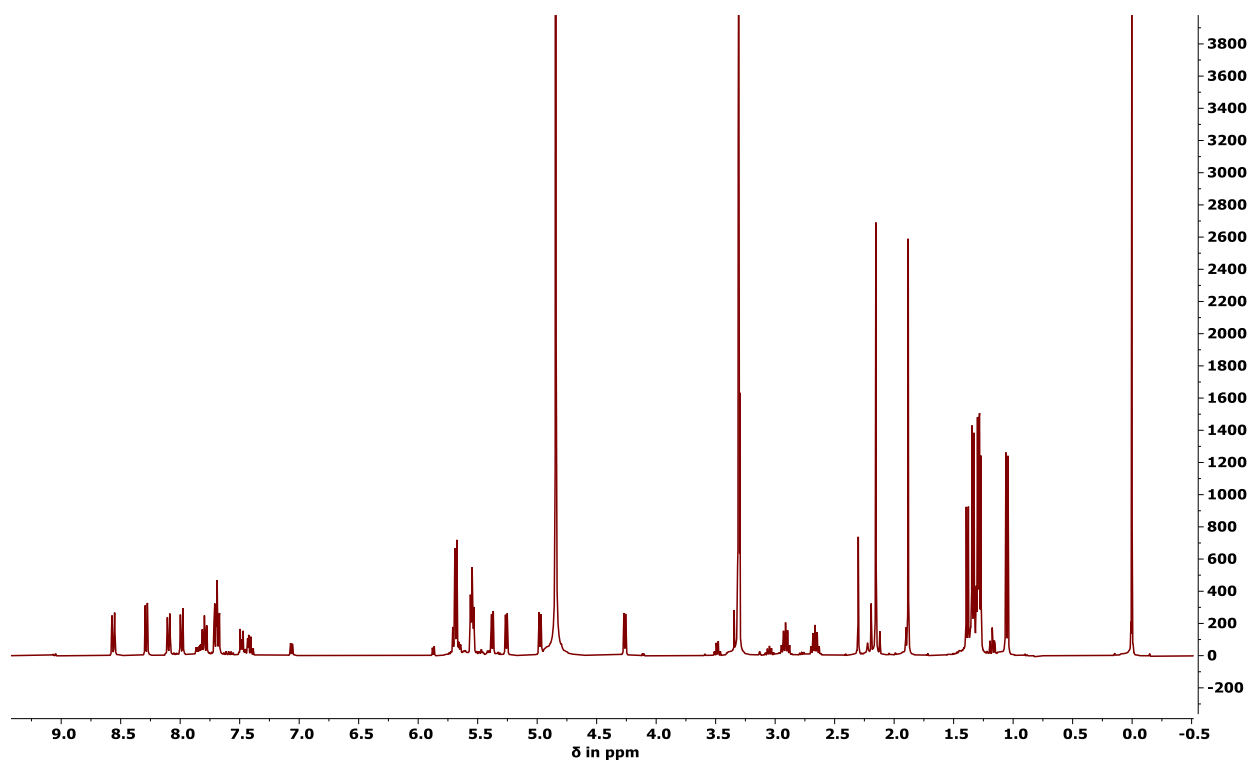

Figure S1. <sup>1</sup>H NMR spectrum of **1**

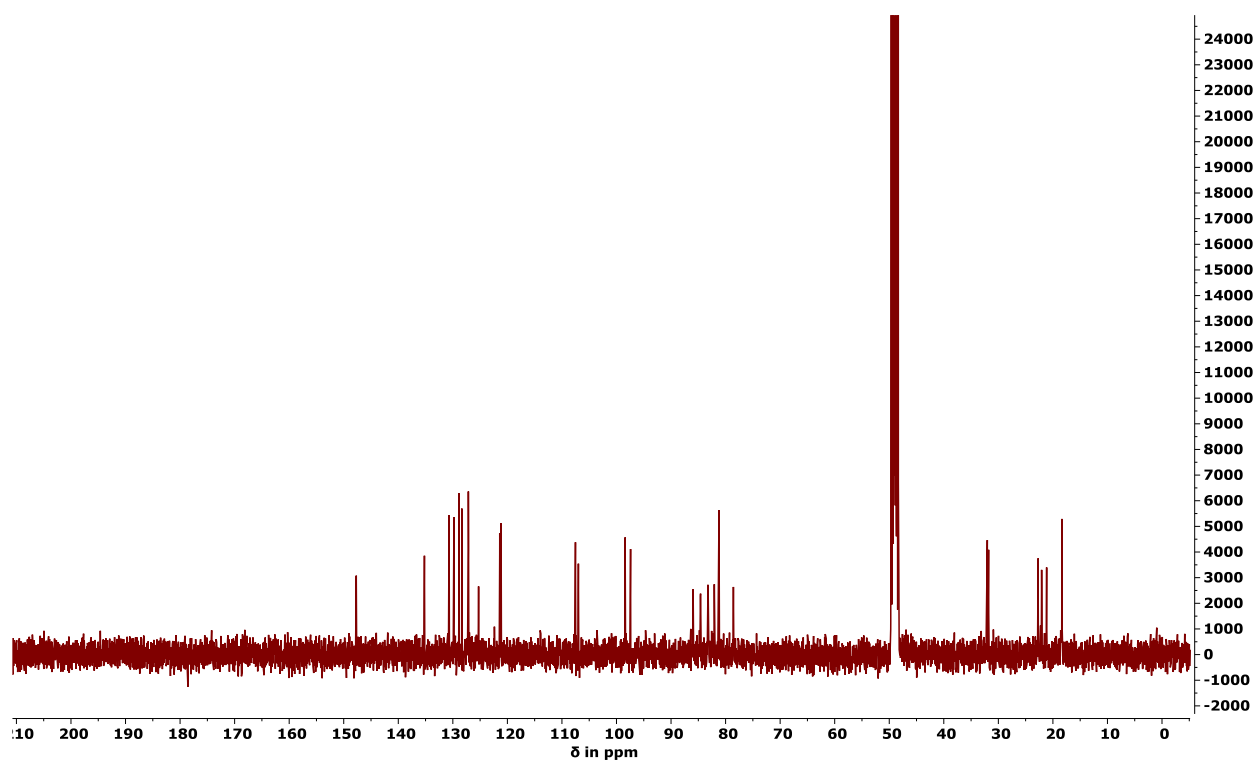

Figure S2.  $^{13}\text{C}$  NMR spectrum of **1**

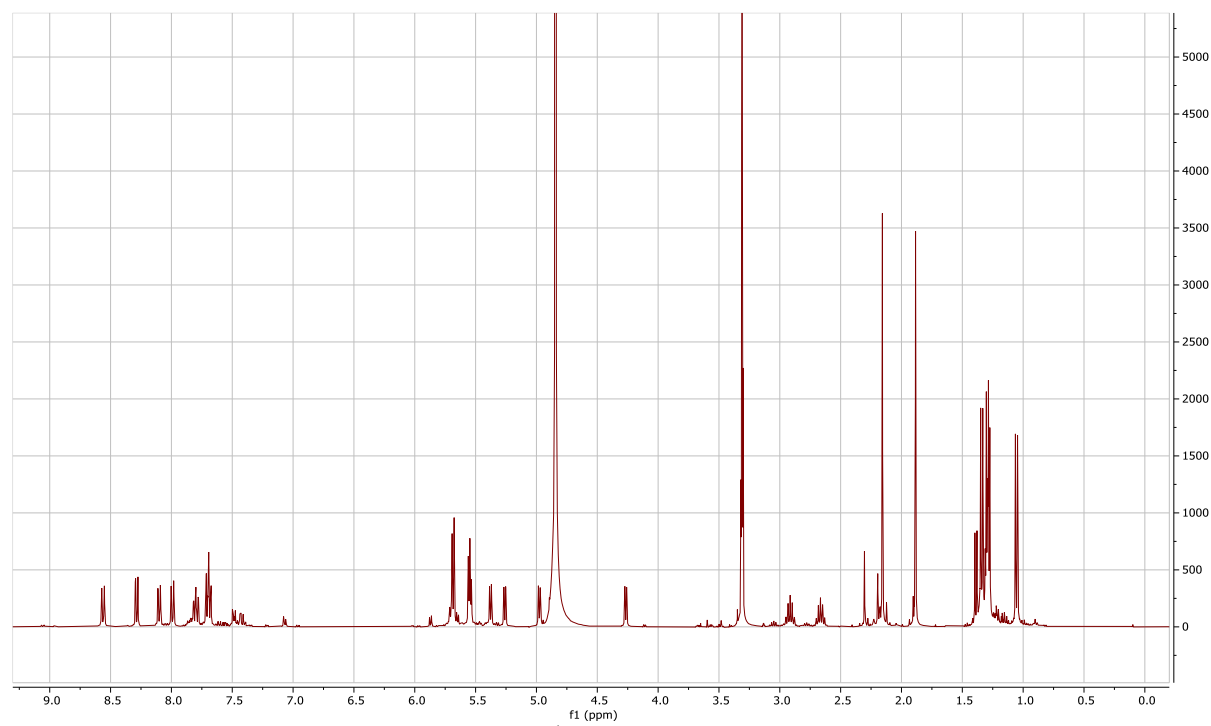

Figure S3.  $^1\text{H}$  NMR spectrum of **2**

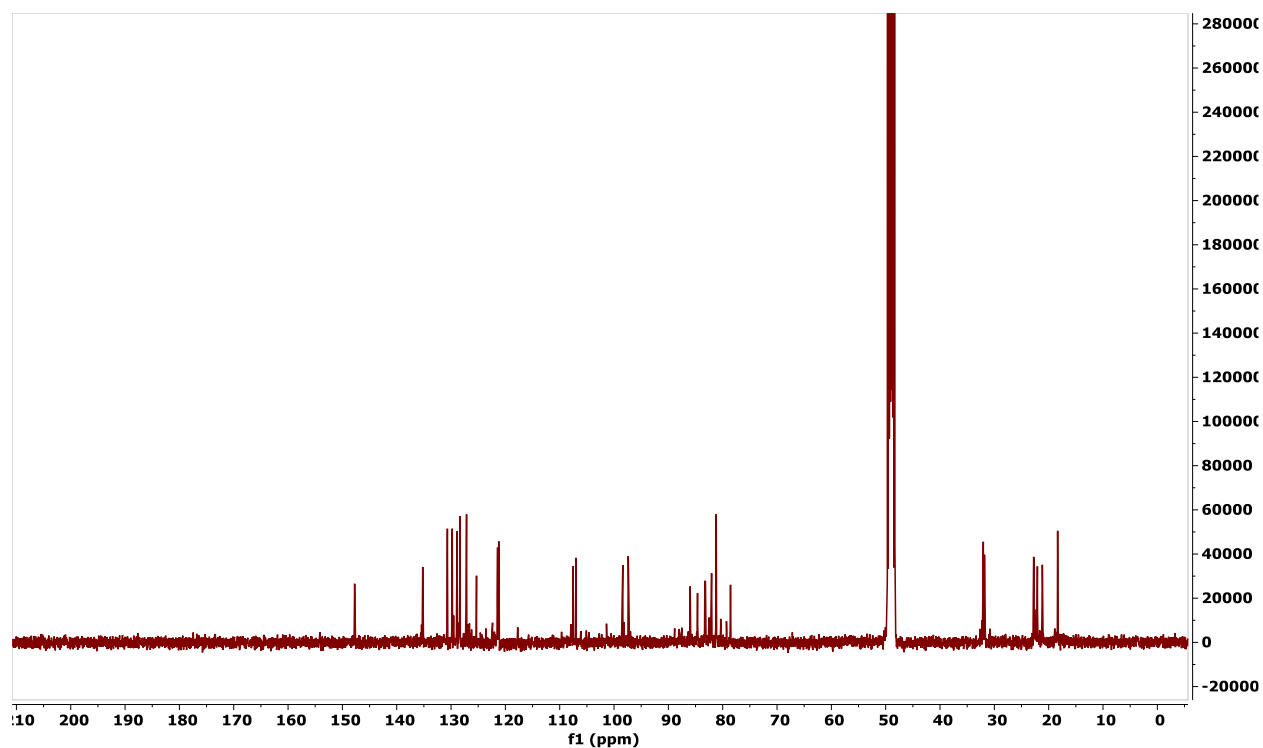

Figure S4. <sup>13</sup>C NMR spectrum of **2**

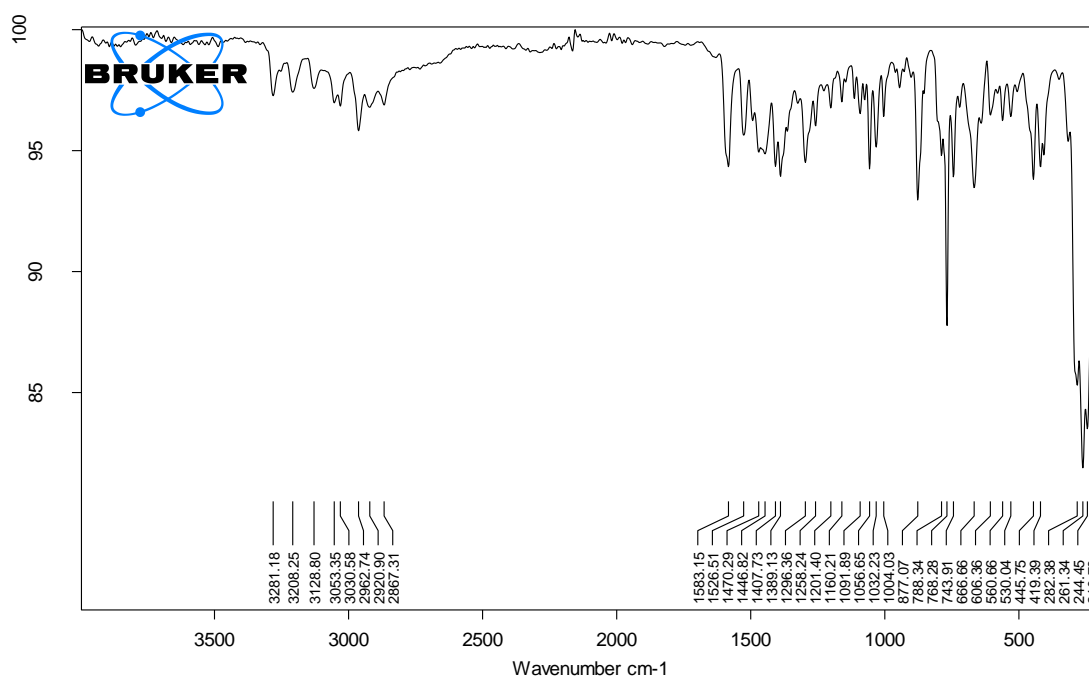

Figure S5. IR spectrum of **2**

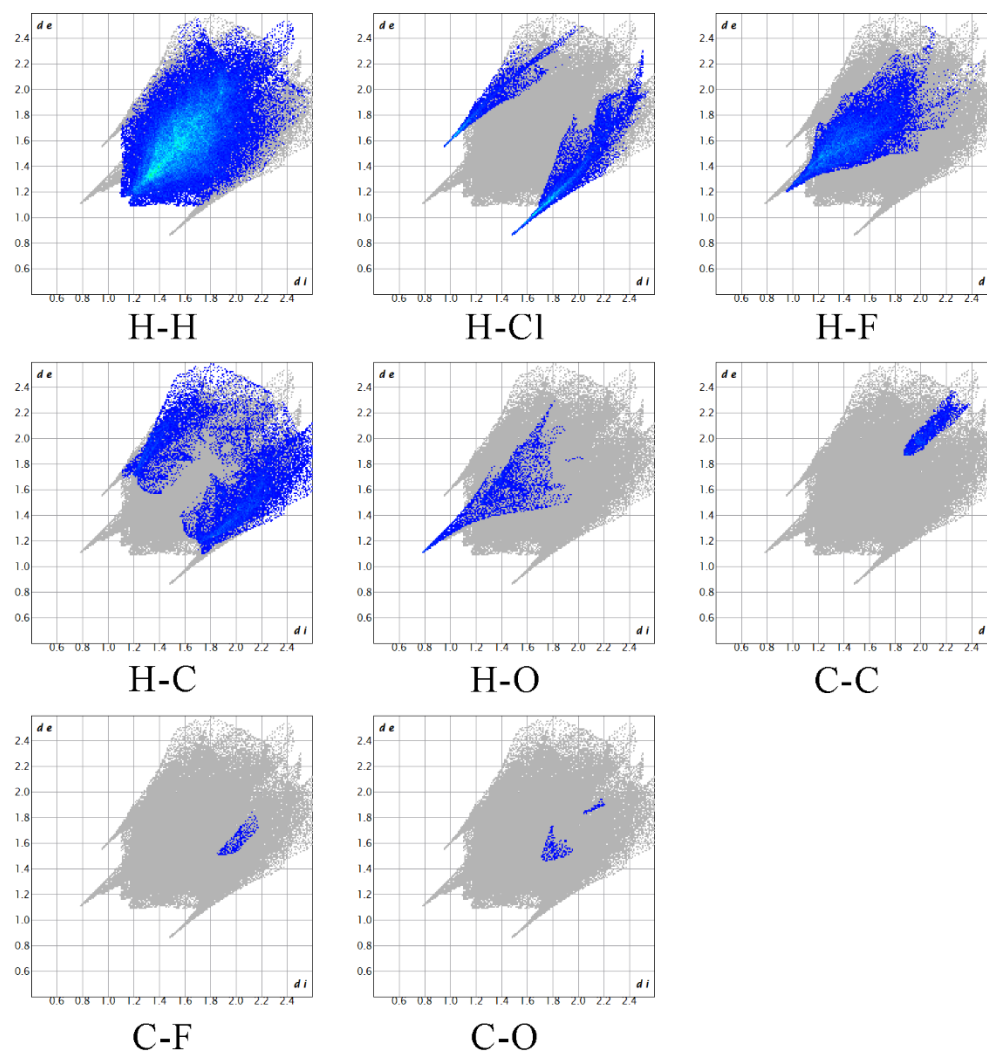

Figure S6. The fingerprint plots for the most abundant contacts in crystal structure of **2·2MeOH**.

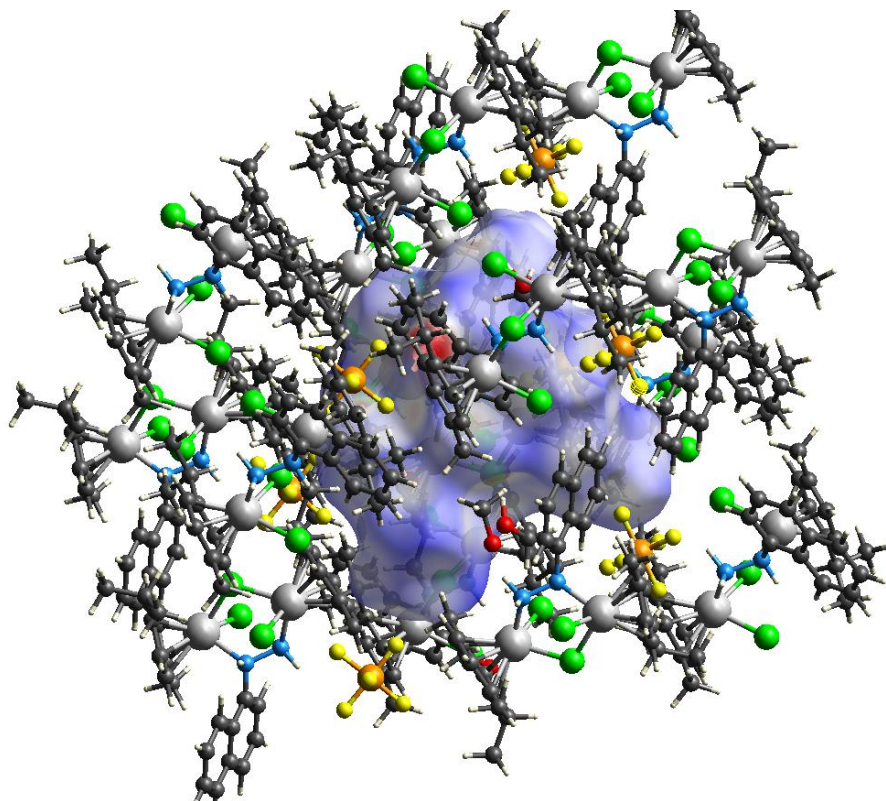

Figure S7. Hirshfeld surface of **2a** with surrounding units.

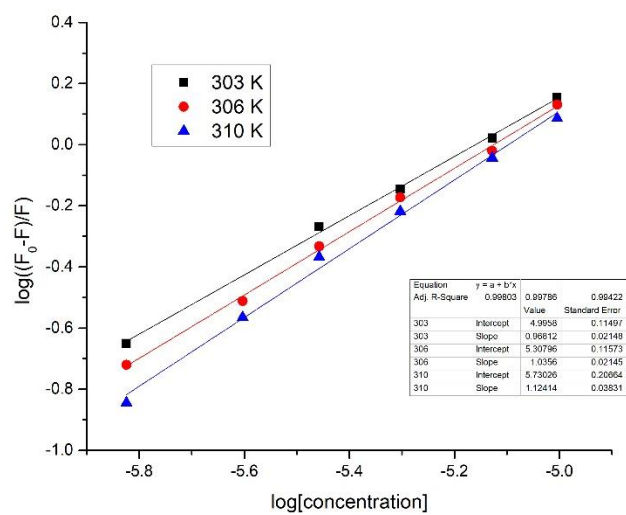

Figure S8. Stern-Volmer plots for the binding of **1** to BSA.

Table S1. The experimental and theoretical bond lengths of **2a** (in Å), the notations follow Figure 1.

| Bond    | Experimental | Theoretical |
|---------|--------------|-------------|
| C1–C2   | 1.402(5)     | 1.440       |
| C1–C6   | 1.434(5)     | 1.414       |
| C1–C7   | 1.508(5)     | 1.502       |
| C2–C3   | 1.425(4)     | 1.406       |
| C3–C4   | 1.404(4)     | 1.443       |
| C4–C5   | 1.435(4)     | 1.410       |
| C4–C8   | 1.523(4)     | 1.517       |
| C5–C6   | 1.392(5)     | 1.436       |
| C8–C9   | 1.513(5)     | 1.533       |
| C9–C10  | 1.555(5)     | 1.547       |
| C11–C16 | 1.404(5)     | 1.413       |
| C11–C12 | 1.430(5)     | 1.440       |
| C11–C17 | 1.508(5)     | 1.501       |
| C12–C13 | 1.401(5)     | 1.406       |
| C13–C14 | 1.431(4)     | 1.443       |
| C14–C15 | 1.413(4)     | 1.411       |
| C14–C18 | 1.516(4)     | 1.517       |
| C15–C16 | 1.422(4)     | 1.411       |
| C18–C20 | 1.519(4)     | 1.533       |
| C18–C19 | 1.544(4)     | 1.546       |
| C21–C22 | 1.371(4)     | 1.382       |
| C21–C30 | 1.425(4)     | 1.433       |
| C21–N2  | 1.465(3)     | 1.460       |
| C22–C23 | 1.410(4)     | 1.412       |
| C23–C24 | 1.369(4)     | 1.375       |
| C24–C25 | 1.422(4)     | 1.420       |
| C25–C26 | 1.411(4)     | 1.421       |
| C25–C30 | 1.435(4)     | 1.439       |
| C26–C27 | 1.366(4)     | 1.375       |
| C27–C28 | 1.416(4)     | 1.414       |
| C28–C29 | 1.373(4)     | 1.379       |
| C29–C30 | 1.423(4)     | 1.425       |
| N1–N2   | 1.467(3)     | 1.465       |
| N1–Ru1  | 2.138(2)     | 2.189       |
| N2–Ru2  | 2.193(2)     | 2.238       |
| Cl1–Ru1 | 2.4063(7)    | 2.444       |
| Cl2–Ru2 | 2.4172(7)    | 2.482       |
| Cl2–Ru1 | 2.4287(7)    | 2.487       |

|                      |           |       |
|----------------------|-----------|-------|
| C13–Ru2              | 2.4150(7) | 2.462 |
| C1–Ru1               | 2.196(3)  | 2.274 |
| C2–Ru1               | 2.161(3)  | 2.229 |
| C3–Ru1               | 2.178(3)  | 2.241 |
| C4–Ru1               | 2.216(3)  | 2.321 |
| C5–Ru1               | 2.171(3)  | 2.279 |
| C6–Ru1               | 2.171(3)  | 2.239 |
| C11–Ru2              | 2.203(3)  | 2.276 |
| C12–Ru2              | 2.165(3)  | 2.247 |
| C13–Ru2              | 2.184(3)  | 2.275 |
| C14–Ru2              | 2.226(3)  | 2.311 |
| C15–Ru               | 2.198(3)  | 2.238 |
| C16–Ru               | 2.175(3)  | 2.230 |
| R                    |           | 0.999 |
| MAE [ $\text{\AA}$ ] |           | 0.031 |

Table S2. The experimental and theoretical bond angles of **2a** (in  $^\circ$ ), the notations follow Figure 1.

| Angle     | Experimental | Theoretical |
|-----------|--------------|-------------|
| C2–C1–C6  | 117.2(3)     | 116.9       |
| C2–C1–C7  | 121.7(3)     | 120.6       |
| C6–C1–C7  | 121.1(3)     | 122.4       |
| C2–C1–Ru1 | 69.91(17)    | 69.7        |
| C6–C1–Ru  | 69.89(17)    | 70.4        |
| C7–C1–Ru1 | 128.5(2)     | 128.7       |
| C1–C2–C3  | 121.7(3)     | 121.2       |
| C1–C2–Ru1 | 72.57(18)    | 73.07       |
| C3–C2–Ru1 | 71.47(16)    | 72.11       |
| C4–C3–C2  | 121.2(3)     | 121.7       |
| C4–C3–Ru1 | 72.82(16)    | 74.60       |
| C2–C3–Ru1 | 70.18(16)    | 71.21       |
| C3–C4–C5  | 116.9(3)     | 117.1       |
| C3–C4–C8  | 123.1(3)     | 119.1       |
| C5–C4–C8  | 120.0(3)     | 123.8       |
| C3–C4–Ru1 | 69.93(15)    | 68.57       |
| C5–C4–Ru1 | 69.22(15)    | 70.53       |
| C8–C4–Ru1 | 129.3(2)     | 131.5       |
| C6–C5–C4  | 122.0(3)     | 121.0       |

|             |           |       |
|-------------|-----------|-------|
| C6–C5–Ru1   | 71.29(16) | 69.99 |
| C4–C5–Ru1   | 72.60(15) | 73.77 |
| C5–C6–C1    | 121.0(3)  | 121.9 |
| C5–C6–Ru1   | 71.31(16) | 72.96 |
| C1–C6–Ru1   | 71.78(16) | 73.08 |
| C9–C8–C4    | 113.7(3)  | 114.5 |
| C9–C8–C10   | 110.0(3)  | 111.2 |
| C4–C8–C10   | 108.5(3)  | 108.6 |
| C16–C11–C12 | 116.8(3)  | 117.0 |
| C16–C11–C17 | 121.7(3)  | 120.8 |
| C12–C11–C17 | 121.5(3)  | 122.1 |
| C16–C11–Ru2 | 70.19(16) | 70.67 |
| C12–C11–Ru2 | 69.45(17) | 69.61 |
| C17–C11–Ru2 | 129.3(2)  | 128.8 |
| C13–C12–C11 | 121.6(3)  | 121.1 |
| C13–C12–Ru2 | 71.93(17) | 71.98 |
| C11–C12–Ru2 | 72.35(17) | 73.13 |
| C12–C13–C14 | 121.0(3)  | 121.8 |
| C12–C13–Ru2 | 70.49(17) | 71.33 |
| C14–C13–Ru2 | 72.70(16) | 74.29 |
| C15–C14–C13 | 117.9(3)  | 117.0 |
| C15–C14–C18 | 123.3(3)  | 123.9 |
| C13–C14–C18 | 118.8(3)  | 119.1 |
| C15–C14–Ru2 | 70.29(16) | 70.66 |
| C13–C14–Ru2 | 69.46(16) | 68.78 |
| C18–C14–Ru2 | 131.3(2)  | 131.3 |
| C14–C15–C16 | 120.2(3)  | 121.2 |
| C14–C15–Ru2 | 72.47(16) | 73.51 |
| C16–C15–Ru2 | 70.13(16) | 70.46 |
| C11–C16–C15 | 122.4(3)  | 121.8 |
| C11–C16–Ru2 | 72.41(17) | 72.94 |
| C15–C16–Ru2 | 71.93(16) | 72.55 |
| C14–C18–C20 | 113.9(3)  | 114.5 |
| C14–C18–C19 | 107.3(3)  | 108.6 |
| C20–C18–C19 | 111.4(3)  | 111.3 |
| C22–C21–C30 | 121.9(2)  | 121.3 |
| C22–C21–N2  | 119.0(2)  | 119.0 |
| C30–C21–N2  | 119.1(2)  | 119.6 |
| C21–C22–C23 | 120.1(3)  | 120.4 |
| C24–C23–C22 | 120.5(3)  | 120.2 |
| C23–C24–C25 | 120.6(3)  | 120.8 |



|             |            |        |
|-------------|------------|--------|
| C26–C25–C24 | 121.3(2)   | 120.9  |
| C26–C25–C30 | 119.0(3)   | 119.2  |
| C24–C25–C30 | 119.7(2)   | 119.9  |
| C27–C26–C25 | 121.3(3)   | 121.1  |
| C26–C27–C28 | 120.1(3)   | 119.8  |
| C29–C28–C27 | 120.4(3)   | 120.9  |
| C28–C29–C30 | 120.7(3)   | 120.8  |
| C29–C30–C21 | 124.3(2)   | 124.5  |
| C29–C30–C25 | 118.5(2)   | 118.2  |
| C21–C30–C25 | 117.2(2)   | 117.3  |
| N2–N1–Ru1   | 116.16(16) | 116.3  |
| C21–N2–N1   | 111.6(2)   | 112.7  |
| C21–N2–Ru2  | 112.84(16) | 115.4  |
| N1–N2–Ru2   | 115.98(15) | 110.5  |
| Ru2–Cl2–Ru1 | 110.47(3)  | 109.72 |
| N1–Ru1–C2   | 91.60(10)  | 95.74  |
| N1–Ru1–C6   | 153.87(12) | 155.69 |
| C2–Ru1–C6   | 67.92(12)  | 65.97  |
| N1–Ru1–C5   | 158.36(10) | 159.11 |
| C2–Ru1–C5   | 80.26(12)  | 77.66  |
| C6–Ru1–C5   | 37.40(12)  | 36.68  |
| N1–Ru1–C3   | 93.63(10)  | 97.57  |
| C2–Ru1–C3   | 38.35(11)  | 37.04  |
| C6–Ru1–C3   | 80.40(11)  | 77.66  |
| C5–Ru1–C3   | 67.58(11)  | 65.18  |
| N1–Ru1–C1   | 115.85(11) | 118.90 |
| C2–Ru1–C1   | 37.52(12)  | 36.51  |
| C6–Ru1–C1   | 38.33(13)  | 37.28  |
| C5–Ru1–C1   | 68.56(13)  | 66.61  |
| C3–Ru1–C1   | 68.73(12)  | 66.36  |
| N1–Ru1–C4   | 120.19(10) | 122.40 |
| C2–Ru1–C4   | 68.55(11)  | 65.79  |
| C6–Ru1–C4   | 68.61(11)  | 66.29  |
| C5–Ru1–C4   | 38.18(11)  | 36.83  |
| C3–Ru1–C4   | 37.25(10)  | 35.70  |
| C1–Ru1–C4   | 81.87(11)  | 78.60  |
| N1–Ru1–Cl1  | 83.98(6)   | 84.86  |
| C2–Ru1–Cl1  | 118.71(9)  | 119.47 |
| C6–Ru1–Cl1  | 91.70(8)   | 90.47  |
| C5–Ru1–Cl1  | 117.53(8)  | 115.73 |
| C3–Ru–Cl1   | 157.00(8)  | 156.45 |

|             |            |        |
|-------------|------------|--------|
| C1–Ru1–Cl1  | 91.68(9)   | 91.87  |
| C4–Ru1–Cl1  | 155.43(7)  | 152.48 |
| N1–Ru1–Cl2  | 85.57(7)   | 82.88  |
| C2–Ru1–Cl2  | 154.54(9)  | 152.28 |
| C6–Ru1–Cl2  | 119.94(10) | 120.86 |
| C5–Ru–Cl2   | 93.21(9)   | 93.79  |
| C3–Ru1–Cl2  | 116.50(8)  | 115.47 |
| C1–Ru1–Cl2  | 158.17(10) | 158.14 |
| C4–Ru1–Cl2  | 91.09(8)   | 91.49  |
| Cl1–Ru1–Cl2 | 86.19(2)   | 88.08  |
| C12–Ru2–C16 | 67.60(12)  | 65.86  |
| C12–Ru2–C13 | 37.58(12)  | 36.69  |
| C16–Ru2–C13 | 79.90(12)  | 77.58  |
| C12–Ru2–N2  | 150.19(11) | 157.52 |
| C16–Ru2–N2  | 92.39(10)  | 96.80  |
| C13–Ru2–N2  | 163.77(10) | 157.74 |
| C16–Ru2–C15 | 37.95(11)  | 36.99  |
| C13–Ru2–C15 | 67.55(11)  | 65.25  |
| N2–Ru2–C15  | 97.62(9)   | 97.21  |
| C12–Ru2–C11 | 38.20(13)  | 37.27  |
| C16–Ru2–C11 | 37.40(12)  | 36.40  |
| C13–Ru2–C11 | 68.57(13)  | 66.60  |
| N2–Ru2–C11  | 113.25(11) | 120.59 |
| C15–Ru2–C11 | 68.49(12)  | 66.29  |
| C12–Ru2–C14 | 68.25(12)  | 66.46  |
| C16–Ru2–C14 | 67.89(11)  | 65.87  |
| C13–Ru2–C14 | 37.84(10)  | 36.93  |
| N2–Ru2–C14  | 125.96(9)  | 121.10 |
| C15–Ru2–C14 | 37.24(10)  | 35.83  |
| C11–Ru2–C14 | 81.33(12)  | 78.74  |
| C12–Ru2–Cl3 | 88.23(9)   | 90.46  |
| C16–Ru2–Cl3 | 125.23(9)  | 118.32 |
| C13–Ru2–Cl3 | 110.26(8)  | 116.31 |
| N2–Ru2–Cl3  | 85.87(6)   | 85.45  |
| C15–Ru2–Cl3 | 162.65(8)  | 155.28 |
| C11–Ru2–Cl3 | 94.47(9)   | 91.13  |
| C14–Ru2–Cl3 | 147.01(7)  | 153.20 |
| C12–Ru2–Cl2 | 124.60(10) | 118.51 |
| C16–Ru2–Cl2 | 148.68(9)  | 153.66 |
| C13–Ru2–Cl2 | 95.10(9)   | 92.19  |
| N2–Ru2–Cl2  | 84.06(6)   | 83.49  |

|             |            |        |
|-------------|------------|--------|
| C15–Ru2–Cl2 | 111.58(8)  | 116.71 |
| C11–Ru2–Cl2 | 162.67(10) | 155.77 |
| C14–Ru2–Cl2 | 89.14(8)   | 91.33  |
| Cl3–Ru2–Cl2 | 85.65(2)   | 88.00  |
| R           |            | 0.994  |
| MAE [°]     |            | 1.66   |

Table S3. Experimental and calculated chemical shifts (the numbering scheme follows Figure 2)

| H atom                         | Experimental<br>[ppm] | Theoretical<br>[ppm] | C atom    | Experimental<br>[ppm] | Theoretical<br>[ppm] |
|--------------------------------|-----------------------|----------------------|-----------|-----------------------|----------------------|
| CH <sub>3</sub><br>(isopropyl) | 1.05                  | 1.34                 | C10       | 18.35                 | 18.13                |
| CH <sub>3</sub><br>(isopropyl) | 1.28                  | 1.47                 | C17       | 18.46                 | 19.08                |
| CH <sub>3</sub><br>(isopropyl) | 1.29                  | 1.20                 | C19       | 21.15                 | 19.24                |
| CH <sub>3</sub><br>(isopropyl) | 1.34                  | 1.37                 | C7        | 22.07                 | 19.59                |
| CH <sub>3</sub> (methyl)       | 1.88                  | 1.95                 | C9        | 22.71                 | 26.85                |
| CH <sub>3</sub> (methyl)       | 2.15                  | 1.73                 | C20       | 22.75                 | 27.30                |
| CH (isopropyl)                 | 2.66                  | 2.86                 | C18       | 31.79                 | 34.65                |
| CH (isopropyl)                 | 2.91                  | 2.97                 | C8        | 32.02                 | 35.47                |
| C(15)H                         | 4.26                  | 4.42                 | C17       | 78.57                 | 76.20                |
| C(16)H                         | 4.98                  | 4.77                 | C3        | 81.20                 | 78.00                |
| C(3)H                          | 5.26                  | 4.77                 | C2        | 82.07                 | 83.02                |
| C(2)H                          | 5.38                  | 4.77                 | C16       | 83.16                 | 83.66                |
| C(12)H                         | 5.52                  | 5.06                 | C5        | 83.20                 | 84.97                |
| C(13)H                         | 5.52                  | 5.34                 | C13       | 84.59                 | 87.90                |
| C(5)H                          | 5.68                  | 5.19                 | C15       | 84.62                 | 88.21                |
| C(6)H                          | 5.68                  | 5.47                 | C6        | 85.95                 | 89.96                |
| C(23)H                         | 7.72                  | 7.79                 | C11       | 97.42                 | 99.47                |
| C(27)H                         | 7.67                  | 7.94                 | C1        | 98.42                 | 101.30               |
| C(22)H                         | 7.8                   | 8.09                 | C14       | 106.98                | 114.48               |
| C(28)H                         | 8.29                  | 8.09                 | C22       | 107.52                | 114.61               |
| C(24)h                         | 7.99                  | 8.26                 | C4        | 121.16                | 115.57               |
| C(26)H                         | 8.1                   | 8.32                 | C29       | 121.40                | 116.66               |
| C(29)H                         | 8.56                  | 8.57                 | C30       | 125.27                | 119.85               |
| R                              |                       | 0.994                | C23       | 127.15                | 121.22               |
| MAE [ppm]                      |                       | 0.24                 | C27       | 128.35                | 123.51               |
|                                |                       |                      | C28       | 128.89                | 123.98               |
|                                |                       |                      | C24       | 129.80                | 126.65               |
|                                |                       |                      | C26       | 130.69                | 126.65               |
|                                |                       |                      | C25       | 135.21                | 131.01               |
|                                |                       |                      | C21       | 147.70                | 143.60               |
|                                |                       |                      | R         |                       | 0.996                |
|                                |                       |                      | MAE [ppm] |                       | 3.54                 |

Table S4. Calculated chemical shifts at PBE0/6-31+G(d,p)(H,C,N,Cl)/LanL2DZ(Ru) (lev.1) and PBE0/6-311++G(d,p)(H, C, N, Cl)/LanL2DZ(Ru) (lev.2) (the numbering scheme follows Figure 2)

| H atom                         | lev.1 [ppm] | lev.2 [ppm] | C atom    | lev.1 [ppm] | lev.2 [ppm] |
|--------------------------------|-------------|-------------|-----------|-------------|-------------|
| CH <sub>3</sub><br>(isopropyl) | 1.18        | 1.12        | C10       | 19.03       | 18.28       |
| CH <sub>3</sub><br>(isopropyl) | 1.20        | 1.24        | C17       | 20.80       | 19.51       |
| CH <sub>3</sub><br>(isopropyl) | 1.31        | 1.27        | C19       | 19.07       | 18.67       |
| CH <sub>3</sub><br>(isopropyl) | 1.37        | 1.34        | C7        | 21.57       | 20.06       |
| CH <sub>3</sub> (methyl)       | 1.73        | 2.02        | C9        | 27.81       | 26.92       |
| CH <sub>3</sub> (methyl)       | 2.06        | 2.30        | C20       | 27.97       | 27.03       |
| CH (isopropyl)                 | 2.99        | 3.10        | C18       | 38.80       | 37.47       |
| CH (isopropyl)                 | 2.99        | 3.10        | C8        | 38.89       | 37.24       |
| C(16)H                         | 4.88        | 4.99        | C17       | 78.45       | 79.88       |
| C(3)H                          | 4.81        | 4.96        | C3        | 80.56       | 80.64       |
| C(2)H                          | 4.74        | 8.86        | C2        | 84.24       | 84.28       |
| C(12)H                         | 4.93        | 4.99        | C16       | 83.54       | 84.46       |
| C(13)H                         | 4.93        | 4.99        | C5        | 85.77       | 86.58       |
| C(5)H                          | 5.22        | 5.36        | C13       | 89.70       | 89.59       |
| C(6)H                          | 5.13        | 5.20        | C15       | 87.92       | 88.30       |
| C(23)H                         | 7.78        | 8.01        | C6        | 89.77       | 90.11       |
| C(27)H                         | 7.93        | 8.13        | C11       | 89.77       | 101.43      |
| C(22)H                         | 8.13        | 8.37        | C1        | 103.25      | 101.93      |
| C(28)H                         | 8.01        | 8.17        | C14       | 115.39      | 115.00      |
| C(24)h                         | 8.13        | 8.37        | C22       | 118.22      | 118.16      |
| C(26)H                         | 8.21        | 8.44        | C4        | 117.68      | 116.21      |
| C(29)H                         | 8.45        | 8.75        | C29       | 120.27      | 119.52      |
| R                              | 0.994       | 0.993       | C30       | 122.36      | 121.43      |
| MAE [ppm]                      | 0.26        | 0.23        | C23       | 125.74      | 125.83      |
|                                |             |             | C27       | 127.78      | 127.52      |
|                                |             |             | C28       | 127.93      | 127.56      |
|                                |             |             | C24       | 131.03      | 129.91      |
|                                |             |             | C26       | 130.63      | 129.82      |
|                                |             |             | C25       | 134.00      | 132.32      |
|                                |             |             | C21       | 147.65      | 146.71      |
|                                |             |             | R         | 0.996       | 0.996       |
|                                |             |             | MAE [ppm] | 3.08        | 3.05        |
